# Supplementary material
Source: PubMed Central journal article supplement (PMC55547)
Supplement: pnas_161294798_1.pdf [file pnas_161294798_1.pdf]

Supplementary material for Barnett *et al.* (July 31, 2001) *Proc. Natl. Acad. Sci. USA*, 10.1073/pnas.161294798.

**Purification and cloning of pSymA DNA.** *Sinorhizobium meliloti* strain 1021 (1) was grown in TY broth to an  $OD_{600} = 1$  (2). Agarose-embedded DNA was prepared by using a CHEF bacterial genomic DNA plug kit (Bio-Rad) with the modification that more cells were used, approximately  $2 \times 10^9$  cells for each milliliter of agarose plugs. Because the circular replicons of *S. meliloti* are not easily separated, even by pulsed-field gel electrophoresis (PFGE; refs. 3 and 4), agarose-embedded DNA was digested with the restriction enzyme *SwaI* (Boehringer Mannheim, 40 units enzyme per plug). *SwaI* linearizes pSymA into a 1.4-Mb DNA that is easily separated from the chromosomal and pSymb DNAs by using a CHEF-DR III apparatus (Bio-Rad) and the following conditions: 1% pulsed-field certified agarose (Bio-Rad) in  $1/2 \times$  TBE buffer (90 mM Tris/64.6 mM boric acid/2.5 mM EDTA, pH 8.3), a switch time ramped from 60 to 120 s over 24 h, 120 degrees field angle, and a field strength of 6 V/cm. After PFGE, the pSymA band was excised and electroeluted in a dialysis bag by using PFGE and the same conditions described above. The yield of purified pSymA DNA per 14 cm gel was approximately 0.3  $\mu$ g. The pSymA DNA was purified either once or twice by this procedure. DNA from multiple gels was pooled, concentrated, and sheared randomly (5). A portion of this DNA, 1–2 kb in size, was purified by HPLC, cloned into a linker/adaptor version of M13mp18 to minimize chimeras (R.W.H., unpublished work), and sequenced by using the BigDye terminator technology on ABI377-XL sequencers.

References:

1. Meade, H. M., Long, S. R., Ruvkun, G. B., Brown, S. E. & Ausubel, F. M. (1982) *J. Bacteriol.* **149**, 114–122.
2. Beringer, J. E. (1974) *J. Gen. Microbiol.* **84**, 188–198.
3. Jumas-Bilak, E., Michaux-Charachon, S., Bourg, G., Ramuz, M. & Allardet-Servent, A. (1998) *J. Bacteriol.* **180**, 2749–2755.
4. Sobral, B. W., Honeycutt, R. J., Atherly, A. G. & McClelland, M. (1991) *J. Bacteriol.* **173**, 5173–5180.
5. Thorstenson, Y. R., Hunicke-Smith, S. P., Oefner, P. J. & Davis, R. W. (1998) *Genome Res.* **8**, 848–855.
